# Supplementary material for: A conformational transition in the structure of a 2′-thiomethyl-modified DNA visualized at high resolution
Source: Royal Society of Chemistry journal article supplement (doi:10.1039/b822781k), 2009-01-01
Supplement: b822781k.pdf [file b822781k.pdf]

## **Supporting Information**

### **A Conformational Transition in the Structure of a 2'- Thiomethyl-Modified DNA Visualized at High Resolution**

Pradeep S. Pallan,<sup>a</sup> Thazha P. Prakash,<sup>b</sup> Feng Li,<sup>a</sup> Robert L. Eoff,<sup>a</sup>  
Muthiah Manoharan<sup>c</sup> and Martin Egli<sup>\*a</sup>

<sup>a</sup>*Department of Biochemistry, Vanderbilt University, Nashville, Tennessee 37232,*

<sup>b</sup>*Department of Medicinal Chemistry, Isis Pharmaceuticals Inc., Carlsbad, California  
92008, and* <sup>c</sup>*Department of Drug Discovery, Alnylam Pharmaceuticals Inc., Cambridge,  
Massachusetts 02142*

\*E-mail: martin.egli@vanderbilt.edu

*Oligonucleotide synthesis:* Both modified DNA oligonucleotides GCGTAU\*ACGC and CGCGAAU\*U\*CGCG (U\*=2'-SMe-rU) were synthesized via the solid-phase phosphoramidite approach and following published procedures.<sup>S1</sup> The 10mer and 12mer were purified by reverse phase HPLC and characterized by ES-MS and their purities were >95% as evaluated by capillary gel electrophoresis.

*Crystallization and data collection:* Crystals were grown by the hanging-drop vapor diffusion technique using the Nucleic Acid Miniscreen<sup>S2</sup> (Hampton Research, Aliso Viejo, CA). Crystals were mounted in nylon loops without further cryo-protection and frozen in liquid nitrogen. Diffraction data were collected on insertion beamlines at sector 21 of the Life Sciences Collaborative Access Team (LS-CAT) at the Advanced Photon Source (Argonne National Laboratory, Argonne, Illinois). Diffraction data were processed with the programs HKL2000<sup>S3</sup> (RNase-H complex; see below) or XDS<sup>S4</sup> (10 and 12-mer duplexes). Both the 10mer and 12mer crystals are of space group  $P2_12_12_1$ , whereby the asymmetric unit contained a single duplex and two independent duplexes, respectively.

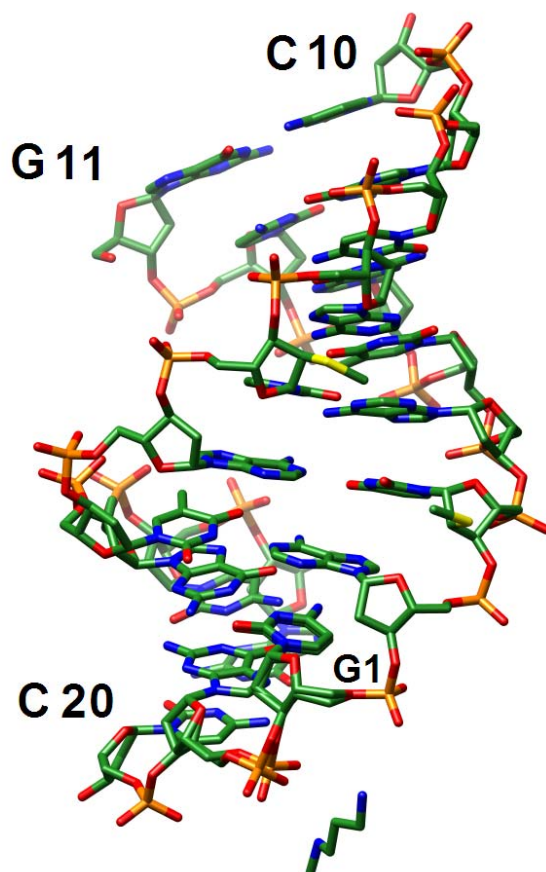

**Fig. S1.** Overall geometry of the A-form duplex formed by the decamer GCGTAU\*ACGC. The view is into the central minor groove and a partial spermine molecule is visible near the G1:C20 terminus of the duplex. Local conformational flexibility in the backbones was resolved by applying dual occupancy for two phosphates in the crystallographic refinement.

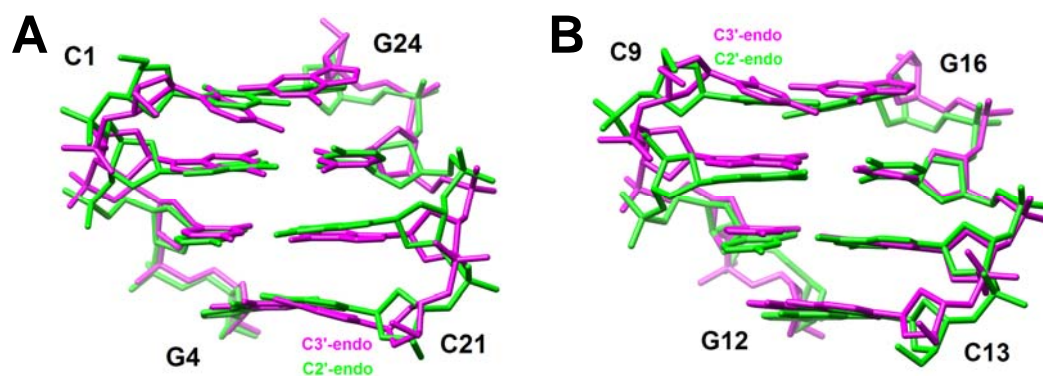

**Fig. S2.** Comparison between the geometries of G-tract regions in the native (green) and 2'-SMe-modified (purple) DDDs. Only the superimpositions of the (A) top and (B) bottom G-tracts for the first of the two modified DDD duplexes per asymmetric unit in the structure of [CGCGAAU\*U\*CGCG]<sub>2</sub> is shown. The deviations relative to the native DDD for the second duplex are very similar.

**Table S1.** Selected crystal data and refinement parameters for the duplexes [GCGTAU\*ACGC]<sub>2</sub> and [CGCGAAU\*U\*CGCG]<sub>2</sub> and the complex between *B. halodurans* RNase H (*Bh*-RNase H) and [CGCGAAU\*U\*CGCG]<sub>2</sub> (U\*=2'-SM<sub>e</sub>-U).

| Parameter                               | 5'-CGCGAAU*U*CGCG-3'                                  | 5'-GCGTAU*ACGC-3'                                     | <i>Bh</i> -RNase H (D132N mutant)/<br>5'-CGCGAAU*U*CGCG-3' |
|-----------------------------------------|-------------------------------------------------------|-------------------------------------------------------|------------------------------------------------------------|
| <b>Crystal data</b>                     |                                                       |                                                       |                                                            |
| Space group                             | <i>P</i> 2 <sub>1</sub> 2 <sub>1</sub> 2 <sub>1</sub> | <i>P</i> 2 <sub>1</sub> 2 <sub>1</sub> 2 <sub>1</sub> | <i>C</i> 2                                                 |
| No. of strands per asym. unit           | 4                                                     | 2                                                     | 1 RNase H and 1 single strand                              |
| Cell dimensions                         |                                                       |                                                       |                                                            |
| <i>a</i> , <i>b</i> , <i>c</i> (Å)      | 40.07 43.22 88.71                                     | 24.69 42.92 46.12                                     | 81.93 66.62 38.77                                          |
| $\alpha$ , $\beta$ , $\gamma$ (°)       | 90.0 90.0 90.0                                        | 90.0 90.0 90.0                                        | 90.0 103.3 90.0                                            |
| <b>Data collection</b>                  |                                                       |                                                       |                                                            |
| No. of reflections                      | 43,276                                                | 23,179                                                | 26,499                                                     |
| Resolution (Å; last shell)              | 1.25 (1.33-1.25)                                      | 1.04 (1.09-1.04)                                      | 1.60 (1.66-1.60)                                           |
| Completeness (%; last shell)            | 96.4 (92.2)                                           | 95.4 (88.6)                                           | 99.4 (96.9)                                                |
| R-merge (%)                             | 8.3                                                   | 2.2                                                   | 7.7                                                        |
| <b>Refinement</b>                       |                                                       |                                                       |                                                            |
| R-work / R-free                         | 0.151/0.208                                           | 0.130/0.164                                           | 0.193/0.261                                                |
| <b>Number of atoms</b>                  |                                                       |                                                       |                                                            |
| DNA / DNA and Protein                   | 985                                                   | 428                                                   | 1,481                                                      |
| Water molecules                         | 349                                                   | 139                                                   | 102                                                        |
| Ions/small molecules                    | 7 Sr <sup>2+</sup> , 2 MPD                            | 1 partial spermine                                    | glycerol                                                   |
| <b>B-factors</b>                        |                                                       |                                                       |                                                            |
| DNA / DNA and Protein (Å <sup>2</sup> ) | 22.9                                                  | 13.9                                                  | 59.2                                                       |
| Water (Å <sup>2</sup> )                 | 39.2                                                  | 14.6                                                  | 45.2                                                       |
| <b>R.m.s. deviations</b>                |                                                       |                                                       |                                                            |
| Bond lengths (Å)                        | 0.013                                                 | 0.016                                                 | 0.009                                                      |
| Bond angles (Å; 1...3 dist.)            | 0.03                                                  | 0.03                                                  | 0.03                                                       |

References:

- S1. W. F. Lima, J. G. Nichols, H. Wu, T. P. Prakash, M. T. Migawa, T. K. Wyrzykiewicz, B. Bhat and S. T. Crooke, *J. Biol. Chem.* 2004, **279**, 36317-36326.
- S2. Berger, I.; Kang, C. H.; Sinha, N.; Wolters, M.; Rich, A. *Acta Cryst. D* **1996**, 52, 465-468.
- S3. Otwinowski, Z.; Minor, W. *Meth. Enzymol.* **1997**, 276, 307-326.
- S4. W. Kabsch, *J. Appl. Cryst.* 1993, **26**, 795-800.
